# Supplementary material
Source: PubMed Central journal article supplement (PMC4011091)
Supplement: supp_141.10.2108_DEV108118.pdf [file supp_141.10.2108_DEV108118.pdf]

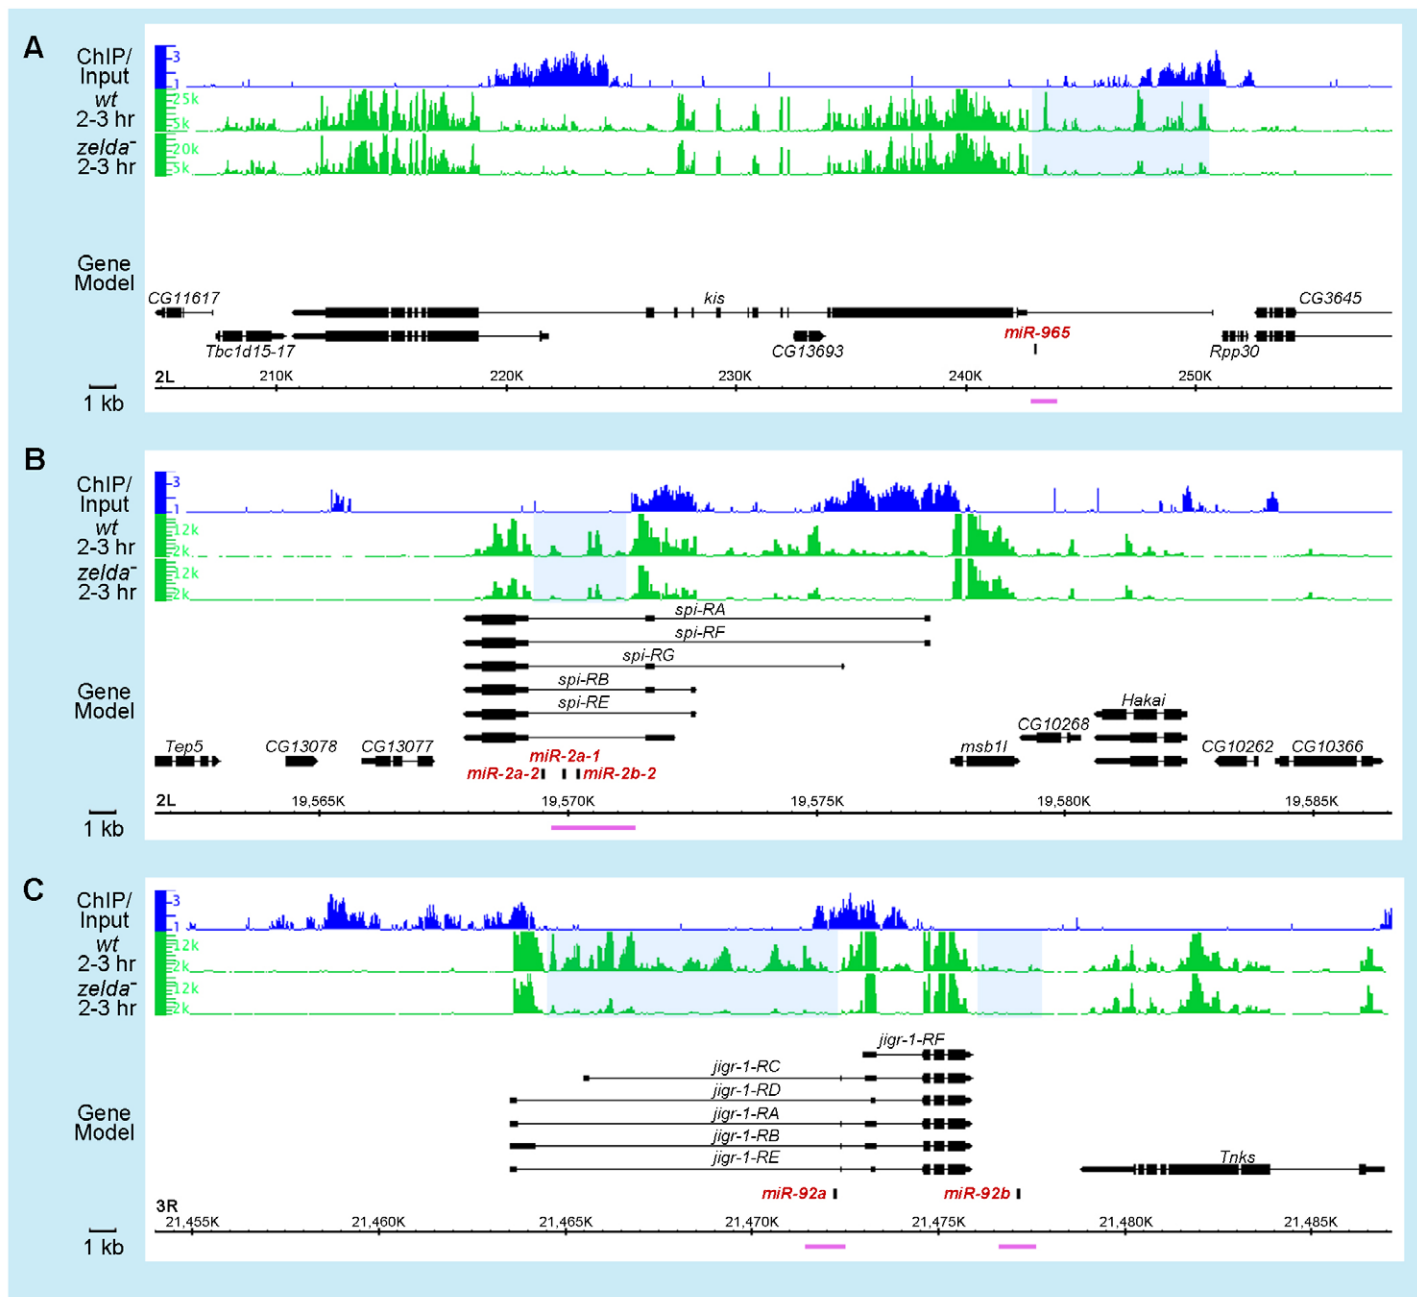

**Fig. S1. Three of the early-expressed miRNAs reside in introns of other genes.** Browser views of three intronic miRNA clusters: (A) *miR-965* in *kis*; (B) *miR-2a-1* cluster in *spi*; (C) *miR-92a* in *jigr-1* (see Fig. 1 legend for description of tracks).

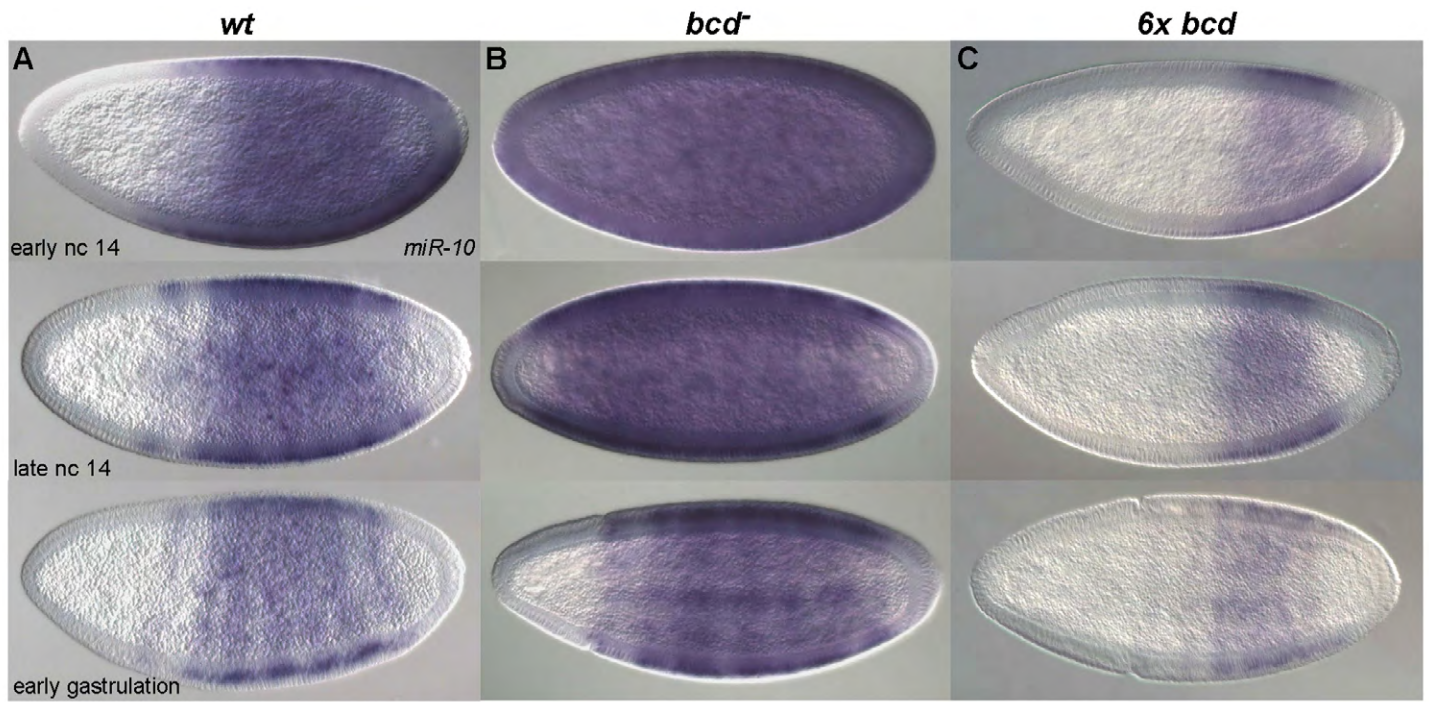

**Fig. S2. The Bcd dependent pathway represses *miR-10*.** Wild-type (*wt*, A), *bcd* mutant (B) and 6x *bcd* embryos (C) hybridized with RNA probes against *pri-miR-10*. In *wt*, *miR-10* is initially expressed in the posterior region (A, early nc 14). Later, as nc 14 progresses, *miR-10* expression refines into seven stripes along the AP axis. In *bcd* mutants, the onset time of *miR-10* expression is not affected (B, early nc 14), but it is detected uniformly across the entire embryo. Though the pattern refines later on, *miR-10* expression expands anteriorly (A, B, mid, late nc 14, and early gastrulation). In contrast, in 6x *bcd* embryos, the anterior repression of *miR-10* expands along with the expansion of the Bcd gradient (C).

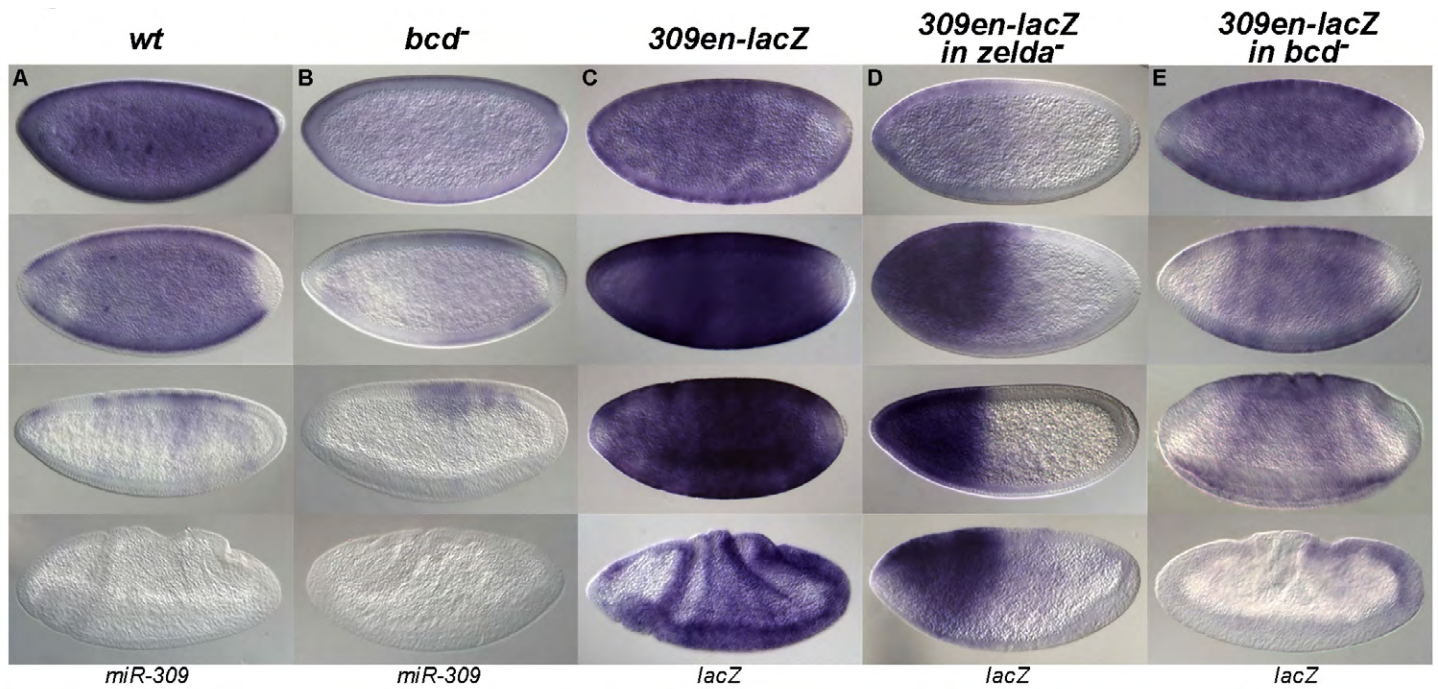

**Fig. S3. The Bcd dependent pathway activates *miR-309*.** Wild-type (*wt*, A, C), *bcd* mutant (B, E) and *zelda* mutant (D) embryos hybridized with RNA probes against *pri-miR-309* transcripts (A, B) or *lacZ* (C, D, E). In *wt*, *miR-309* is initially expressed throughout the entire embryo (A, early nc 14). Later, as nc 14 progresses, *miR-309* refines along both the A-P and D-V axes, as expression is lost in the ventral region and in stripes along A-P axis. In *bcd* mutants, the initial uniform expression of *miR-309* was not affected (B, early nc 14), but became restricted to the posterior region later on (B, late nc 14 and early gastrulation). *lacZ* driven by the *miR-309* enhancer is expressed ubiquitously in the embryo similar to endogenous *miR-309*, suggesting that this enhancer is responsible for *miR-309* activation (C). *lacZ* expression persists into germ band extension stages, indicating that this enhancer is lacking repression elements. In *zelda* mutants, only anterior *lacZ* expression is detected (D). In *bcd* mutants, anterior *lacZ* expression is reduced and eventually lost at the germ band extension stage (E).

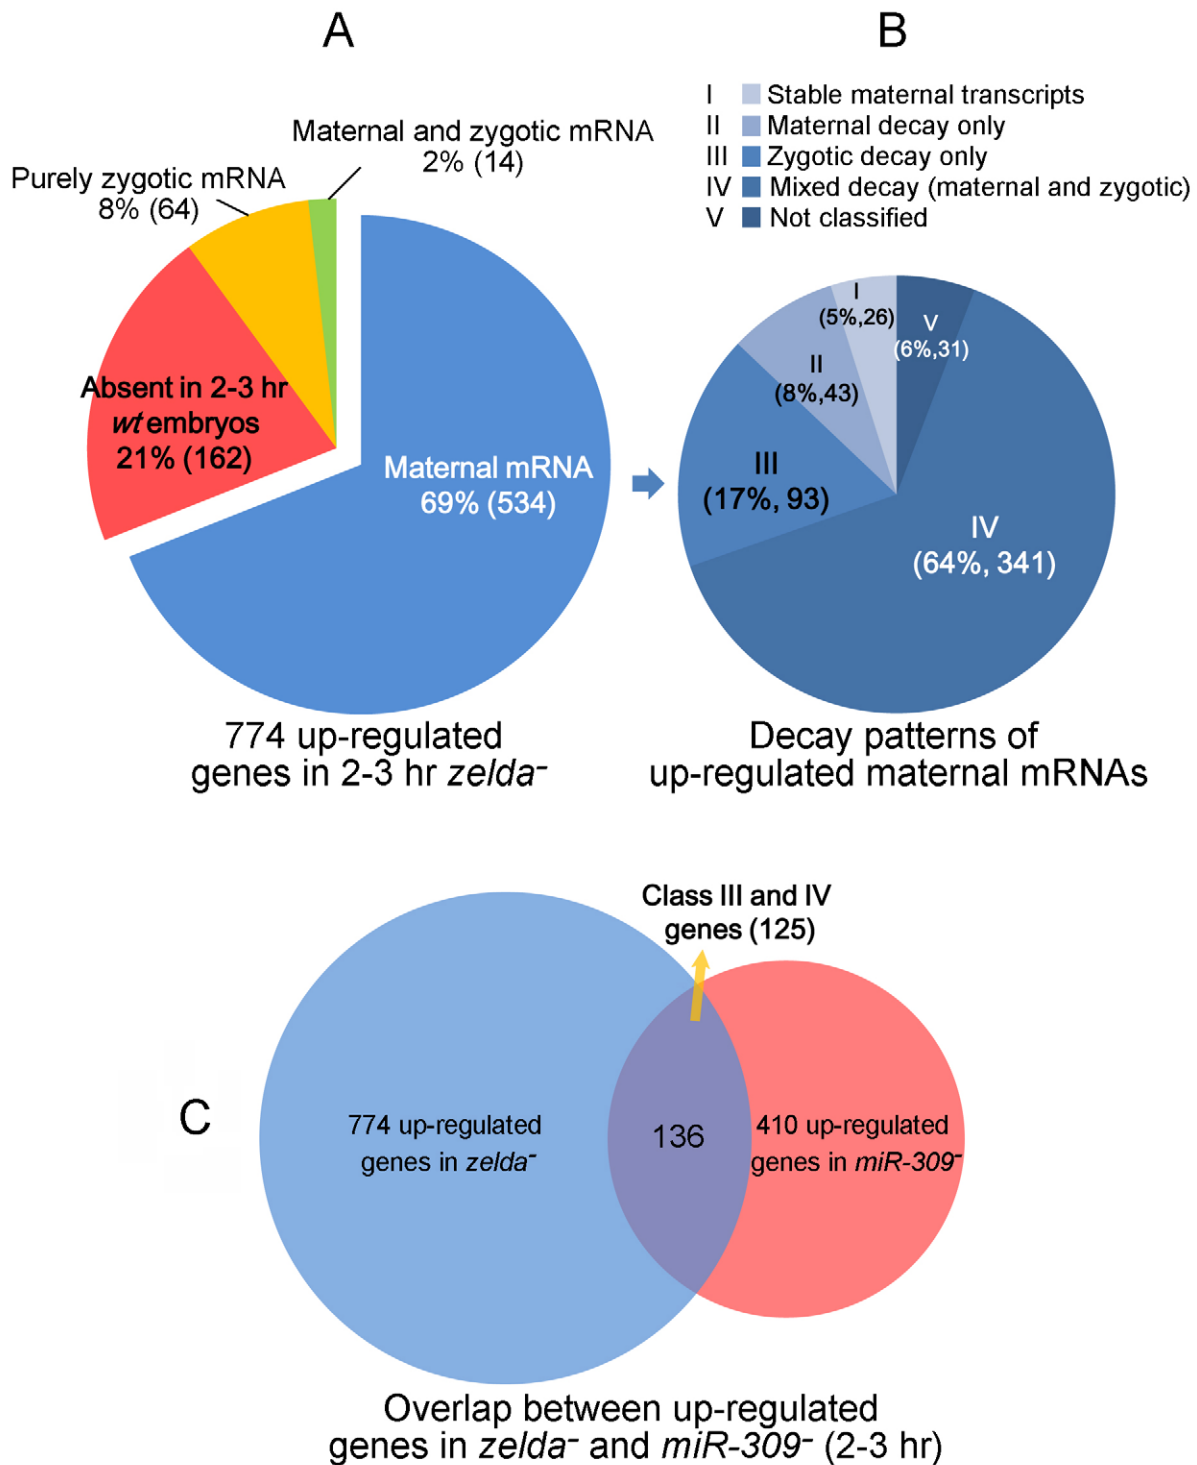

**Fig. S4. Analysis of up-regulated genes in 2-3 hour *zelda* mutant embryos.** (A) Pie chart showing proportion (and number of genes, Supplementary material Table S3) of the 774 up-regulated genes in *zelda* mutants in four categories: maternal mRNA (mRNAs preloaded into the embryo during oogenesis); maternal and zygotic mRNA (mRNAs preloaded and transcribed in the embryo); purely zygotic mRNA (mRNAs newly transcribed in the embryo); and absent (not detected in wild-type (*wt*), but up-regulated in *zelda* mutants). Note that 69% of the up-regulated genes are maternally loaded. (B) Pie chart showing the 534 maternal mRNAs from (A) in 5 categories based on their decay pattern during the MZT (from classification in Thomsen et al., 2010, Supplementary material Table S3). 89% (434) of the up-regulated maternal mRNAs in *zelda* mutants are unstable maternal mRNAs (Supplementary material Table S3), and are degraded either by maternal mRNA decay pathway only (II), or by zygotic mRNA decay pathway only (III), or by both (IV). (C) 136 of the 774 up-regulated genes in *zelda* mutants overlap with those up-regulated in *miR-309* mutants; of these, ~92% (125, Supplementary material Table S3) are type III and IV genes, indicating that the up-regulation of these genes in *zelda* mutants is due to the disruption of the mRNA decay pathway conducted by miR-309.



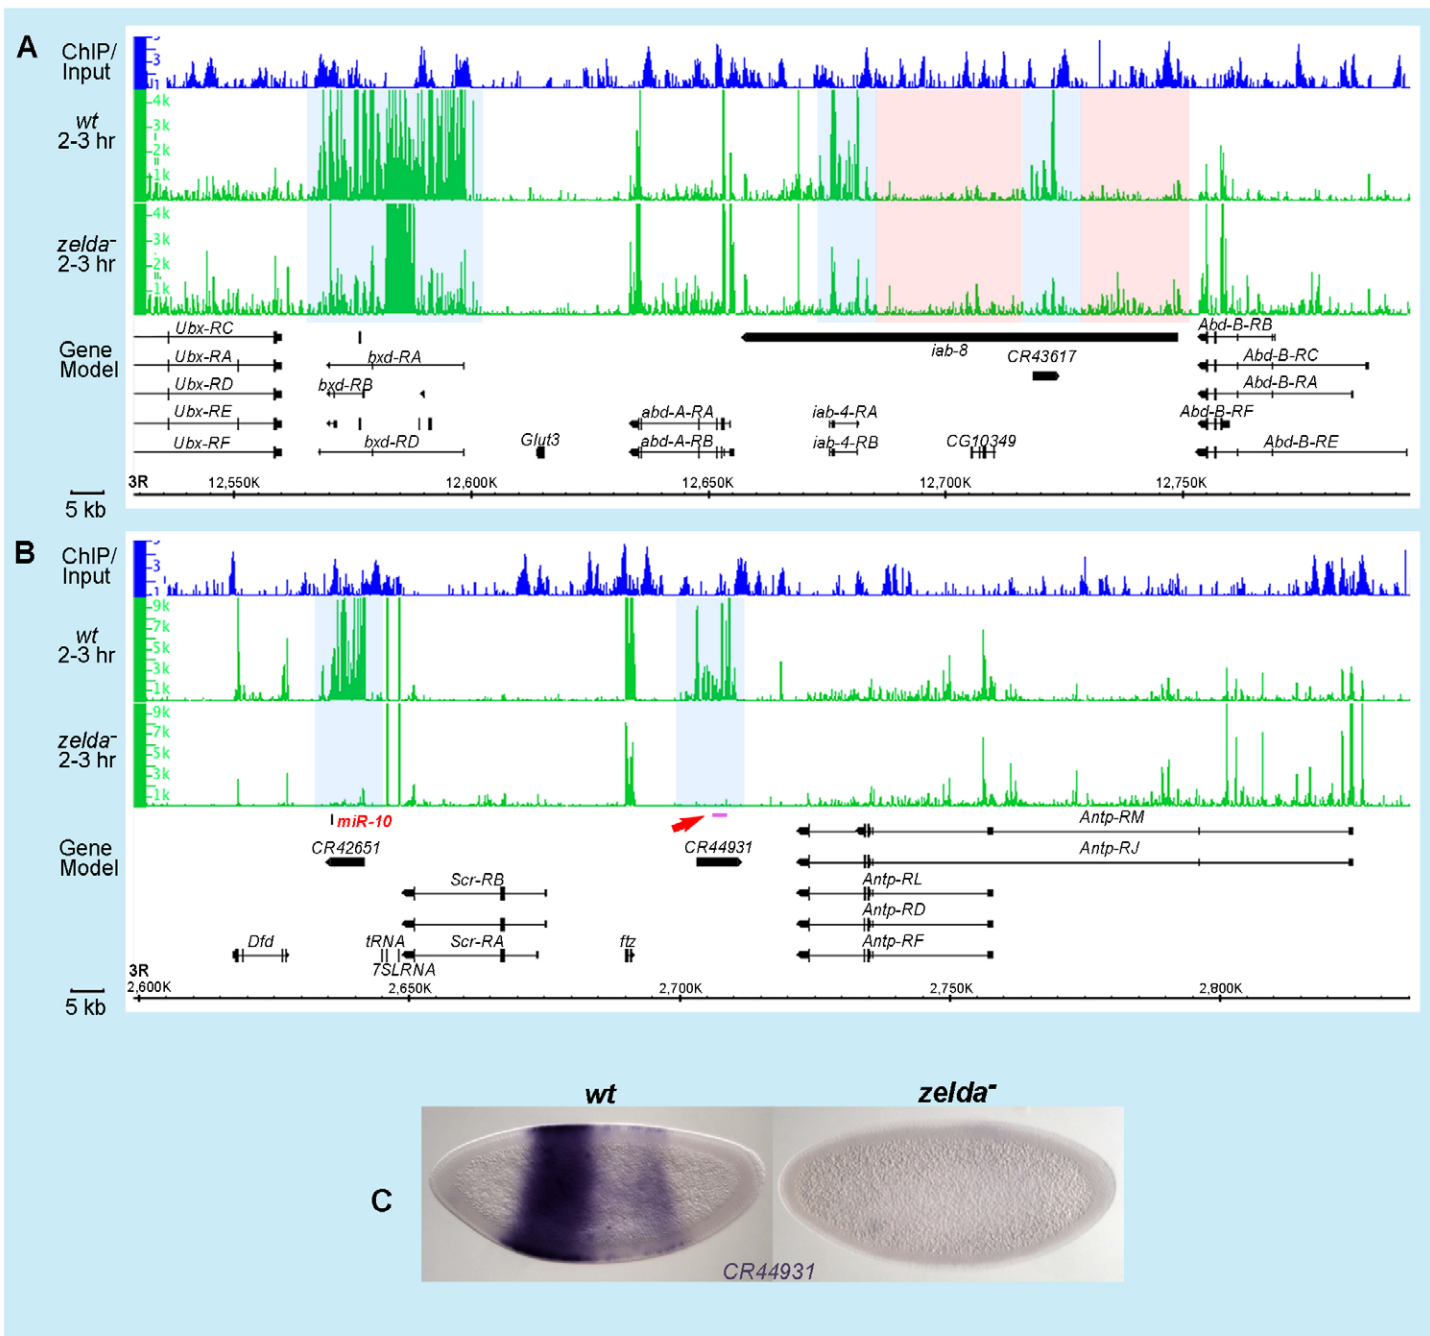

**Fig. S5. MiRNAs and lincRNAs in the Hox gene complexes.** Browser views of genomic regions spanning *Ubx* to *Abd-B* in the *Bithorax complex (BX-C)* (A) and *Dfd* to *Antp* in the *Antennapedia complex (ANT-C)* (B). Tracks above gene models are as described in Figures 1 and S1. Light blue shadowing in the expression tracks indicates regions down-regulated in *zelda* mutants. Light red shadowing indicates regions up-regulated in *zelda* mutants. (C) Wild-type (*wt*) and *zelda* mutant embryos hybridized with RNA probes against *CR44931* (purple line with red arrow in B). Note that *CR44931* is expressed in a broad central domain in *wt*, but is not detected in *zelda* mutants.

**Table S1. miRNAs tested in this study**

| miRNA name              | miRNA position | Host genes   | RNA Probe location        | Probe size (nt) | Expression in 0-6 hr embryos (previous literatures*) | Expression in 1-3 hr wild-type tiling array | Zelda binding within 2 kb of miRNA transcription units or host genes | Nuclei dots in wild-type 1-3 hr | MiRNA expression in <i>zelda</i> <sup>-</sup> compared to wild-type(1-3 hr) |
|-------------------------|----------------|--------------|---------------------------|-----------------|------------------------------------------------------|---------------------------------------------|----------------------------------------------------------------------|---------------------------------|-----------------------------------------------------------------------------|
| <i>miR-1</i>            | intergenic     | n/a          | 2L: 20486777<br>-20488219 | 1443            | yes                                                  | yes                                         | yes                                                                  | yes                             | Down-regulated                                                              |
| <i>miR-10</i>           | intergenic     | n/a          | 3R: 2634611<br>-2636419   | 1809            | yes                                                  | yes                                         | yes                                                                  | yes                             | Down-regulated                                                              |
| <i>miR-11</i>           | intronic       | <i>E2f</i>   | 3R: 17447463<br>-17448432 | 970             | yes                                                  | yes                                         | yes                                                                  | yes                             | Down-regulated                                                              |
| <i>miR-309 cluster</i>  | intergenic     | n/a          | 2R: 15548119<br>-15549170 | 1052            | yes                                                  | yes                                         | yes                                                                  | yes                             | Down-regulated                                                              |
| <i>miR-9a</i>           | intergenic     | n/a          | 3L: 19556781<br>-19558851 | 2071            | yes                                                  | yes                                         | yes                                                                  | yes                             | Down-regulated                                                              |
| <i>miR-92a</i>          | intronic       | <i>jigr1</i> | 3R: 21471476<br>-21472485 | 1010            | yes                                                  | yes                                         | yes                                                                  | yes                             | Down-regulated                                                              |
| <i>miR-92b</i>          | intergenic     | n/a          | 3R: 21476633<br>-21477659 | 1027            | yes                                                  | yes                                         | yes                                                                  | yes                             | Down-regulated                                                              |
| <i>miR-iab-4</i>        | intergenic     | n/a          | 3R: 12681571<br>-12683390 | 1820            | yes                                                  | yes                                         | yes                                                                  | yes                             | Down-regulated                                                              |
| <i>miR-iab-4as</i>      | intergenic     | n/a          | 3R: 12681571<br>-12683390 | 1820            | yes                                                  | yes                                         | yes                                                                  | yes                             | Up-regulated                                                                |
| <i>miR-965</i>          | intronic       | <i>kis</i>   | 2L: 242854<br>-243924     | 1071            | yes                                                  | yes                                         | yes                                                                  | yes                             | Down-regulated                                                              |
| <i>miR-2a-1 cluster</i> | intronic       | <i>spi</i>   | 2L: 19569658<br>-19571349 | 1692            | yes                                                  | yes                                         | yes                                                                  | yes                             | Down-regulated                                                              |
| <i>miR-13a cluster</i>  | intergenic     | n/a          | 3R: 11243042<br>-11244277 | 1237            | yes                                                  | very low                                    | yes                                                                  | no                              | n/a                                                                         |
| <i>miR-2b-1</i>         | intergenic     | n/a          | 2L: 8258046<br>-8259423   | 1378            | yes                                                  | no                                          | no                                                                   | no                              | n/a                                                                         |
| <i>miR-14</i>           | intergenic     | n/a          | 2R: 5440704<br>-5441997   | 1294            | yes                                                  | no                                          | low                                                                  | no                              | n/a                                                                         |
| <i>miR-184</i>          | intergenic     | n/a          | 2R: 9215877<br>-9217583   | 1707            | yes                                                  | no                                          | no                                                                   | no                              | n/a                                                                         |

|                          |            |              |                           |      |     |    |     |    |     |
|--------------------------|------------|--------------|---------------------------|------|-----|----|-----|----|-----|
| <b>miR-310 cluster</b>   | intergenic | n/a          | 2R: 1647100<br>-16471924  | 925  | yes | no | yes | no | n/a |
| <b>miR-263a</b>          | intergenic | n/a          | 2L: 11952599<br>-11954372 | 1774 | yes | no | no  | no | n/a |
| <b>miR-279</b>           | intergenic | n/a          | 3R: 25040758<br>-25042088 | 1331 | yes | no | yes | no | n/a |
| <b>miR-280</b>           | intergenic | n/a          | 2R: 4184860<br>-4186524   | 1665 | yes | no | low | no | n/a |
| <b>miR-281-1 cluster</b> | intronic   | <i>Oda</i>   | 2R: 8057551<br>-8058477   | 927  | yes | no | yes | no | n/a |
| <b>miR-287</b>           | intergenic | n/a          | 2L: 17574021<br>-17575419 | 1399 | yes | no | no  | no | n/a |
| <b>miR-304 cluster</b>   | intronic   | <i>Gmap</i>  | X: 15401733<br>-15403640  | 1908 | yes | no | low | no | n/a |
| <b>miR-305 cluster</b>   | intergenic | n/a          | 2L: 7425191<br>-7426685   | 1495 | yes | no | yes | no | n/a |
| <b>miR-9c</b>            | intronic   | <i>grp</i>   | 2L: 16697657<br>-16698096 | 440  | yes | no | no  | no | n/a |
| <b>miR-306 cluster</b>   | intronic   | <i>grp</i>   | 2L: 16698407<br>-16698892 | 486  | yes | no | no  | no | n/a |
| <b>miR-307</b>           | intronic   | <i>Mmp2</i>  | 2R: 5508113<br>-5509654   | 1542 | yes | no | no  | no | n/a |
| <b>miR-308</b>           | intronic   | <i>RpS23</i> | 2R: 10103276<br>-10103406 | 131  | yes | no | yes | no | n/a |
| <b>miR-31a</b>           | intergenic | n/a          | 2R: 13670690<br>-13672263 | 1574 | yes | no | yes | no | n/a |
| <b>miR-31b</b>           | intergenic | n/a          | X: 8886574<br>-8888275    | 1702 | yes | no | no  | no | n/a |
| <b>miR-7</b>             | intronic   | <i>bl</i>    | 2R: 16493354<br>-16493849 | 496  | yes | no | yes | no | n/a |
| <b>miR-8</b>             | intergenic | n/a          | 2R: 12718272<br>-12719620 | 1349 | yes | no | yes | no | n/a |

\*Aravin et al., 2003; Ruby et al., 2007.

**Table S2. Primer sequences**

| Primer sets     | Primer name            | Forward primers (5'>>3') | Reverse primers (5'>>3') |
|-----------------|------------------------|--------------------------|--------------------------|
| <b>Probe</b>    | miR-1                  | TTTATTACGGGCAACCAACGACG  | AGGGCTTACTGTGCTCCAACCG   |
|                 | miR-10                 | TTGACTGCGTTTTGTTTTATTTC  | GATTCGTCCCTCCTTCTTTGTTT  |
|                 | miR-11                 | CAACCGATCATGCCTGCAACC    | TAAATGTTCTGCAGTTCGGGGCT  |
|                 | miR-309 cluster        | CCGATCCTGGGATGCATCTTGTG  | CCCAAATGTTCAAAGCTTGAG    |
|                 | miR-9a                 | ATGGTACTGCGTGATAGATTGA   | CTTACTTTCGAGTTTATGGTGTTT |
|                 | miR-92a                | CAGCGATCAAATAAACAAATAC   | TAAACAAGAAGCAAACCTCACC   |
|                 | miR-92b                | TTGCTGATCGATGTTGTGGGACG  | AGTGCGTCTCTTTTTCGGGCCTT  |
|                 | miR-iab-4              | GTCTTATGTGACAAGTGCTGGCTA | TCACCACCTCCTTCTCATCGTGCT |
|                 | miR-iab-4as            | GTCTTATGTGACAAGTGCTGGCTA | TCACCACCTCCTTCTCATCGTGCT |
|                 | miR-965                | TTTCGGTTTTGAGCGTATTT     | CTTAGGGTGTAGAGGGGACG     |
|                 | miR-13a cluster        | ATCCTTATTCCTTCTCCGATTTTC | AGCGGCGGAAGCACAGTTAGA    |
|                 | miR-2a-1 cluster       | TACTCCTTCTTTCACATCAA     | CTCTTTCAGTGTGTCTTCTCG    |
|                 | miR-2b-1               | GATTGTGGTTATGTAATGCGAGAC | ATGTTTGCGAGCCAAGTTCAGC   |
|                 | miR-14                 | AGAAAAGAGGGAGACGGCATCA   | CAGCAAAAAGTCCCATGACAAAT  |
|                 | miR-184                | AAATATCATATCACCTTGTAACCC | CAACATTGCCACTTGAAATCCAC  |
|                 | miR-310 cluster        | TTGTTGCACCAGTTGTACGGGAAT | ACAAAAGTGGCATTCCCCTCTACT |
|                 | miR-263a               | TTGAAGCGTTTAGCGTTGGA     | CCTCGGCGGAAATTACCAAC     |
|                 | miR-279                | ACAACAAGAGGGCAAGACATA    | GAGGGGAACTACAGAGGAAT     |
|                 | miR-280                | GTCGGGCGGAGGATGGTTAT     | GGCTTAGGGTCTTCGGTGGG     |
|                 | miR-281-1 cluster      | TGAAAGGTGGGAAGGGATTAGA   | CGCAGCCAGATAACCAGAAGAT   |
| miR-287         | AGCCCTTACCGCAACTTATA   | ATTATCCTGTCATGGGTCTCG    |                          |
| miR-304 cluster | AACCTATTGAAGCACCTCCG   | CACATCCGTTTGGGTGAAGC     |                          |
| miR-305 cluster | CAAGGGTCTGCCGAACGAAACG | GCATGGGAATGAGTGCGGTGAG   |                          |



|                         |                                   |                                                  |                                      |
|-------------------------|-----------------------------------|--------------------------------------------------|--------------------------------------|
| <b>Probe</b>            | miR-9c                            | CGGTGCGAGATTGTTTTACATGTG                         | TTTGCAAGCACAGACGAAGAATTACA           |
|                         | miR-306 cluster                   | CACTCGATGGCTCAGGTACTTAG                          | TGAGAACAAGTAACGCGAGAAAAG             |
|                         | miR-307                           | CATCAGACAGACGACCGACAC                            | ATCCAGCTCATTCCTACTCC                 |
|                         | miR-308                           | CGGATGAGATGGCGGGGTAA                             | AGTCGCTTTTCGCTGCTGGCA                |
|                         | miR-31a                           | TGGGTTTGACAGCAATTAAGGC                           | TTCCGAAACGACAACGACTGG                |
|                         | miR-31b                           | TTGAGACGATGAACGCACTG                             | CGCTAAATACTTGTGCAATAAAC              |
|                         | miR-7                             | GAGGTTGGTGTGCAATCTGAATA                          | ATGTGGATGTAGTGGGATGGGAGG             |
|                         | miR-8                             | GGCGTTATGTGCATGTTTCC                             | ACCTGCTGTCTTGGCTAGTTG                |
|                         | fog-exon3                         | CCTGCTGATTCCGTACTTGCT                            | ATTGTCTGCTGGCTGTTCTGG                |
|                         | fog-intron1                       | CGGAGAACTATGAGTAGGGACG                           | GAAGTGATTGCTGTGAGGGTG                |
| <b>Enhancers tested</b> | miR-1-0.6kb enhancer              | GAAGATCTGTATATGATTGGAGGAAGACTC                   | TTGGCGGCCATCTTCGAGTGCAGTGTGCATCTACGA |
|                         | miR-1-0.6kb TAG m1                | CATAGTTCTGAACGCTCGAGAAGTGCATTTATCCG              | CGGAATAATGTCAGTTCGAGCGTTCAGAAGTATG   |
|                         | miR-1-0.6kb TAG m2                | CTTAGTGAGCAAGTCGACAGCCGAGTGTGCTGGCT              | AGCCAGCACACTCGGCTGTGCACTTGTCTACTAAG  |
|                         | miR-9a enhancer I (9a-I)          | CGGGATCCTTTGATTACGACGAGGGTCAGG                   | TTGGCGGCCAGACGTGGAATGGGAACAAGAT      |
|                         | miR-9a enhancer II (9a-II)        | CGGGATCCTTATAGAGGAGCAAGATACCCG                   | TTGGCGGCCATATGAGATGAGGCAGATGACG      |
|                         | 9a-Ilm1                           | CCTCTAGATGTCTTATATGTGTGCCTCTCATTG                | ACATCTAGAGGGTAGGAGACAAGTACAAAGC      |
|                         | 9a-Ilm2                           | TCACTAGTCAACGCTGCCGGCTCGCAGTCGGCGCTACATAT<br>GAG | TTGACTAGTGATTTTCGGGTTTTGTTTTTGCC     |
|                         | miR-10 enhancer (10-en)           | GAAGATCTTCATGTCAACCCCATCGCAGCA                   | TTGGCGGCCAAGCCGGTAATGTTCTCCCTCA      |
|                         | DNA fragment within miR-10        | GATAGATCTGCCATGGGCGAGG                           | TTGGCGGCCTTCGCTCATTTGAACCAGTA        |
|                         | miR-iab-4 enhancer (iab-en)       | GAAGATCTCTATGTGCTTCCCAAGTGCCA                    | TTGGCGGCCTGCAATTCAGCGAAGGACAAC       |
|                         | DNA fragment upstream miR-iab-4   | GAAGATCTGAAGACTGGCAGACAAATAAACA                  | TTGGCGGCCAATGGTATTGGGATTCGAAGGAC     |
|                         | DNA fragment downstream miR-iab-4 | GAAGATCTGACCGTGGGACCAGATGGATG                    | TTGGCGGCCTTAAACCTCGGCGGGCTAAA        |
|                         | miR-11 enhancer (11-en)           | CGGGATCCTGCTGGAACATACCATCGA                      | TTGGCGGCCCATTTGGGCAGTGTCTTTT         |
|                         | DNA fragment near miR-92a         | CGGGATCCTCAGAACTCCCACTCCTC                       | TTGGCGGCCATTGGACTTCGGACAGGTA         |

**Table S3. Analysis of the 774 upregulated genes in 2-3 h zelda mutants.**

[Download Table S3](#)
